# Supplementary material
Source: ML conference proceedings conference paper supplement (https://www.ecva.net/papers/eccv_2022/papers_ECCV/html/136980157_ECCV_2022_paper.php)
Supplement: Supplementary file 1 [file 136980157-supp.pdf]

# Supplementary Material for TIPS: Text-Induced Pose Synthesis

Prasun Roy<sup>1</sup>, Subhankar Ghosh<sup>1</sup>, Saumik Bhattacharya<sup>2</sup>,  
Umapada Pal<sup>3</sup>, and Michael Blumenstein<sup>1</sup>

<sup>1</sup> University of Technology Sydney, Australia  
prasun.roy@student.uts.edu.au, subhankar.ghosh@student.uts.edu.au,  
michael.blumenstein@uts.edu.au

<sup>2</sup> Indian Institute of Technology Kharagpur, India  
saumik@ece.iitkgp.ac.in

<sup>3</sup> Indian Statistical Institute Kolkata, India  
umapada@isical.ac.in

<https://prasunroy.github.io/tips>

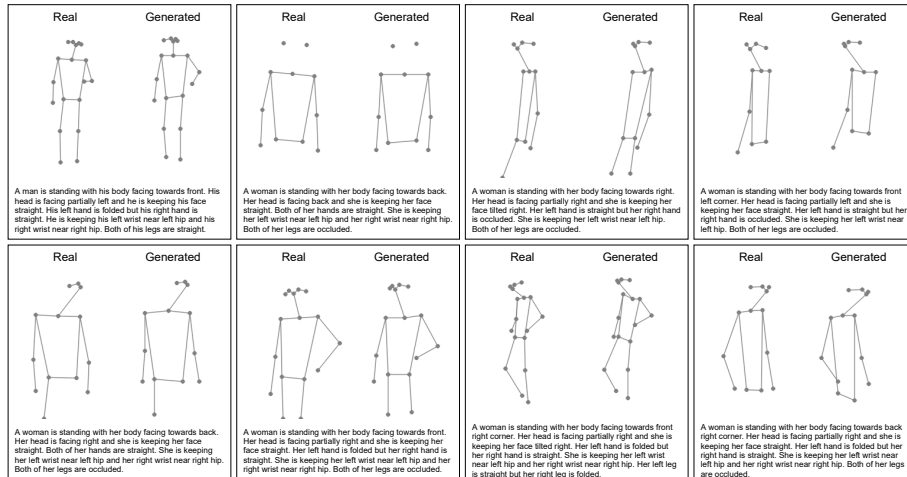

**Fig. 1.** Additional qualitative results of text to pose generation in stage 1. For each example, **Left:** Actual target pose (Ground Truth), **Right:** Generated pose conditioned purely on the textual description of the target pose, **Bottom:** Textual description of the target pose.

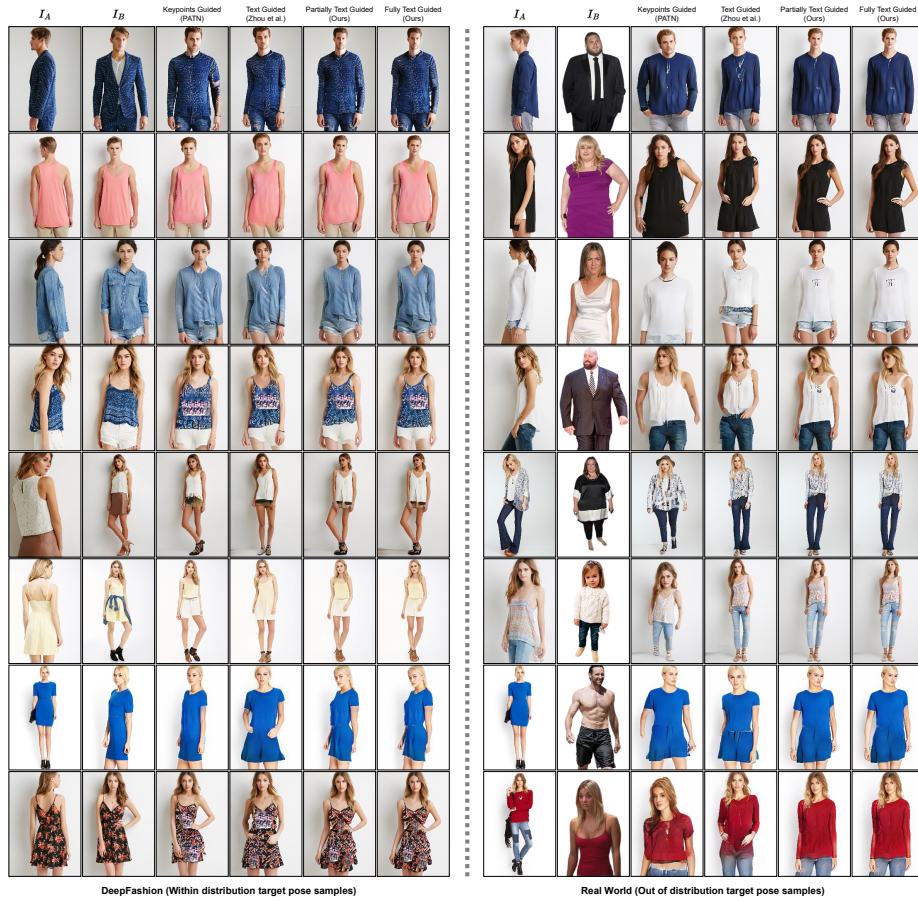

**Fig. 2.** Additional qualitative comparison among different pose transfer algorithms. Keypoint-guided methods tend to produce structurally inaccurate results when the physical appearance of the target pose reference significantly differs from the condition image. This observation is more frequent for the *out of distribution* target poses. The proposed text-guided technique successfully addresses this issue while retaining the ability to generate visually decent results close to the keypoint-guided baseline.

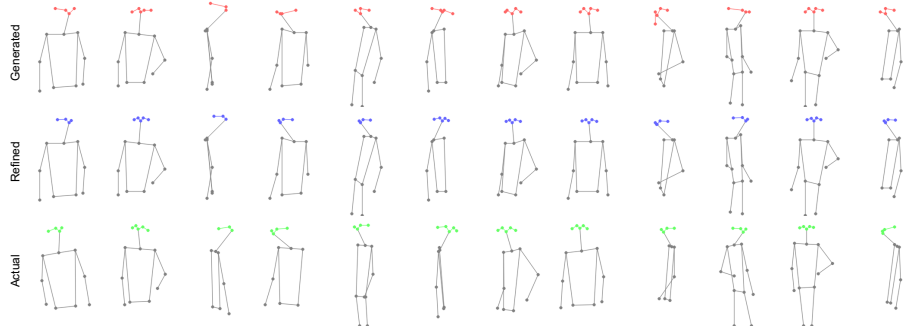

**Fig. 3.** Additional qualitative results of regressive refinement in stage 2. The refinement is performed specifically on the facial keypoints (marked with color). **Top:** Estimated keypoints from textual description in stage 1. **Middle:** Refined keypoints in stage 2. **Bottom:** Actual keypoints (Ground Truth).

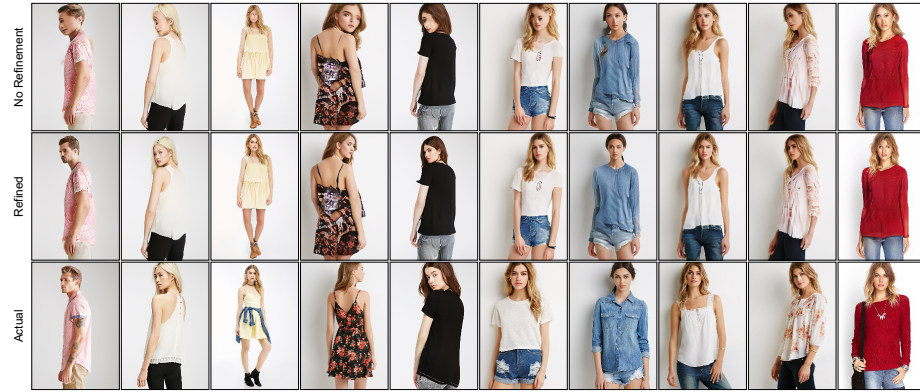

**Fig. 4.** Additional qualitative results with and without refinement. **Top:** Images generated without refinement. **Middle:** Images generated with refinement. **Bottom:** Actual target images (Ground Truth). The regressive refinement (stage 2) significantly improves the final generation quality by correcting the spatial coordinates of the keypoints estimated from textual description (stage 1).

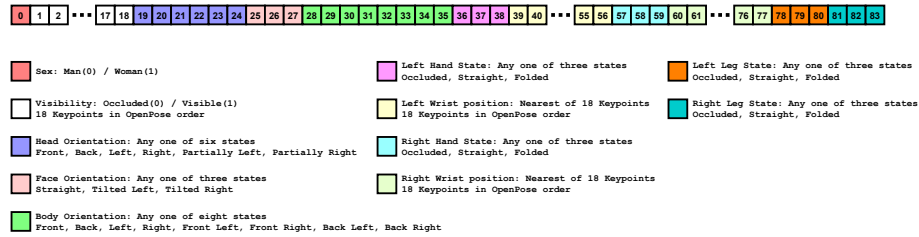

**Fig. 5.** The layout of the many-hot encoding vector in the proposed DF-PASS dataset.

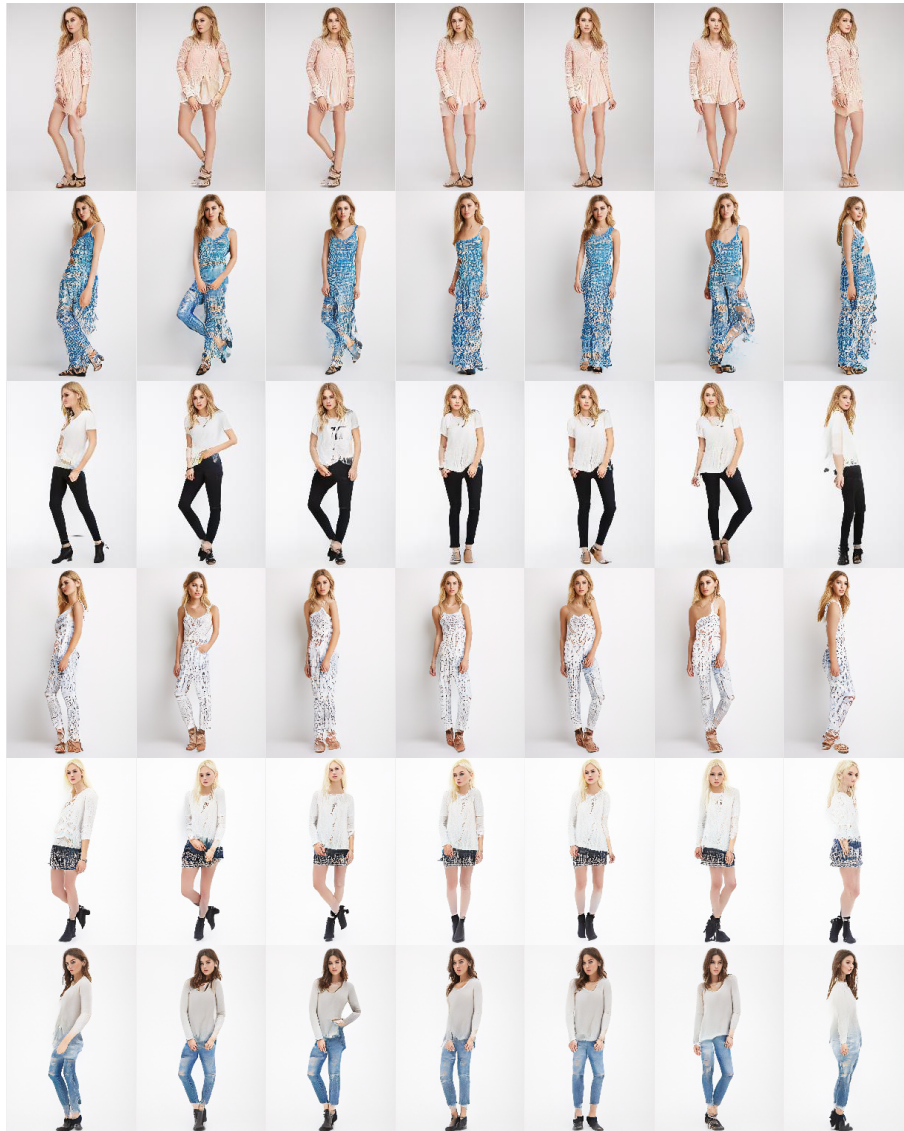

Fig. 6. Text-assisted 180° interpolation in standing pose using the proposed method.
